# Supplementary material for: Antibody dependent enhancement of frog virus 3 infection
Source: Virol J. 2010 Feb 18;7:41. doi: 10.1186/1743-422X-7-41 (PMC2830962; doi:10.1186/1743-422X-7-41)
Supplement: Additional file 3 — Addition of rabbit pre-immune serum to BF-2 cells inhibits ADE. Original plaque numbers and standard error from three individual experiments are shown. [file 1743-422X-7-41-S3.XLS]

## Sheet: Sheet1
		Trial 1		Trial 2		Trial 3
								Std. Error	Std. Error
		Pre-immune	Anti-FV3	Pre-immune	Anti-FV3	Pre-immune	Anti-FV3	Pre-immune	Anti-FV3
		serum	serum	serum	serum	serum	serum	serum	serum
	0 ng	43	212	48	226	51	217	0.581607	0.473774
	100 ng	45	202	51	229	48	192	0.433013	1.3253
	500 ng	41	172	51	195	49	172	0.773084	0.992151
	1000 ng	42	82	52	95	51	97	0.791387	0.847715
